# Supplementary material
Source: MDPI journal article supplement (https://www.mdpi.com/2073-445X/12/10/1836)

# Supplementary Materials to the Technical note “Forest inventory data provide useful information for ecosystem service potential mapping”

Authors: Edgars Jūrmalis <sup>1,2</sup>, Arta Bārdule <sup>1</sup>, Jānis Donis <sup>1</sup>, Linda Gerra-Inohosa <sup>1</sup> and Zane Libiete <sup>1,\*</sup>

<sup>1</sup> Latvian State Forest Research Institute ‘Silava’

<sup>2</sup> University of Latvia

\* Correspondence: zane.libiete@silava.lv

**Table S1.** Indicators for evaluating the potential of selected forest ecosystem services in Latvia (ES section, group and class according to CICES version 5.1.)

| Section                  | Group                                                                                    | Class                                                                                           | Code    | Indicator                                                                                 | Unit                      | Description/<br>data source                                                                                         | Stand<br>attributes<br>used for<br>calculation                   | Score<br>confidence* |
|--------------------------|------------------------------------------------------------------------------------------|-------------------------------------------------------------------------------------------------|---------|-------------------------------------------------------------------------------------------|---------------------------|---------------------------------------------------------------------------------------------------------------------|------------------------------------------------------------------|----------------------|
| Provisioning<br>(biotic) | Wild plants<br>(terrestrial<br>and aquatic)<br>for nutrition,<br>materials or<br>energy  | Wild plants<br>(terrestrial and<br>aquatic,<br>including fungi,<br>algae) used for<br>nutrition | 1.1.5.1 | Potential bilberry<br>( <i>Vaccinium<br/>myrtillus</i> ) yield                            | kg ha <sup>-1</sup> year  | Calculated according<br>to forest type group,<br>stand age and density                                              | Site type,<br>stand<br>density,<br>stand age                     | 2                    |
|                          |                                                                                          |                                                                                                 |         | Potential<br>lingonberry<br>( <i>Vaccinium vitis-<br/>idaea</i> ) yield                   |                           |                                                                                                                     |                                                                  |                      |
|                          | Wild animals<br>(terrestrial<br>and aquatic)<br>for nutrition,<br>materials or<br>energy | Wild animals<br>(terrestrial and<br>aquatic) used for<br>nutritional<br>purposes                | 1.1.6.1 | Habitat suitability<br>for game species<br>(Roe deer,<br><i>Capreolus<br/>capreolus</i> ) | Suitability class         | Calculated according<br>to the habitat<br>suitability class in<br>different site types for<br>specific game species | Land cover,<br>forest site<br>type class,<br>forest age<br>class | 1                    |
|                          |                                                                                          |                                                                                                 |         | Habitat suitability<br>for game species<br>(Red deer, <i>Cervus<br/>elaphus</i> )         | Suitability class 0-<br>5 | Calculated according<br>to the habitat<br>suitability class in<br>different site types for<br>specific game species | Land cover,<br>forest site<br>type class,<br>forest age<br>class |                      |
|                          |                                                                                          |                                                                                                 |         | Habitat suitability<br>for game species<br>(moose, <i>Alces<br/>alces</i> )               |                           |                                                                                                                     |                                                                  |                      |
|                          |                                                                                          |                                                                                                 |         | Habitat suitability<br>for game species                                                   |                           |                                                                                                                     |                                                                  |                      |

| Section                           | Group                                                                               | Class                                                                                                       | Code     | Indicator                                                                               | Unit                           | Description/<br>data source                                                                                                     | Stand<br>attributes<br>used for<br>calculation           | Score<br>confidence* |
|-----------------------------------|-------------------------------------------------------------------------------------|-------------------------------------------------------------------------------------------------------------|----------|-----------------------------------------------------------------------------------------|--------------------------------|---------------------------------------------------------------------------------------------------------------------------------|----------------------------------------------------------|----------------------|
|                                   |                                                                                     |                                                                                                             |          | (wildboar, <i>Sus scrofa</i> )                                                          |                                |                                                                                                                                 |                                                          |                      |
| Regulation & Maintenance (biotic) | Mediation of wastes or toxic substances of anthropogenic origin by living processes | Bioremediation by microorganisms, algae, plants and animals                                                 | 2.1.1.1  | Potential phytoremediation by trees and ground vegetation                               | Phytoremediation potential     | Calculated according to the phytoremediation potential of specific trees and plants and their occurrence in specific site types | Forest site type                                         | 4                    |
|                                   | Mediation of nuisances of anthropogenic origin                                      | Noise attenuation                                                                                           | 2.1.2.2  | Noise attenuation potential                                                             | % from the full density (100%) | Expressed as total stand density by tree species group (conifers/broadleaves)                                                   | Dominant tree species, stand density (sum of all layers) | 3                    |
|                                   | Mediation of waste, toxics and other nuisances by non-living processes              | Mediation by other chemical or physical means (e.g. via filtration, sequestration, storage or accumulation) | 5.1.1.3  | Stabilization potential of toxic heavy metals (Hg, Pb, Cd)                              | cm                             | Calculated according to organic layer depth in forest soils in different site types                                             | Forest site type                                         | 1                    |
|                                   | Mediation of anthropogenic pressure by biotic and abiotic processes                 | Regulation of ecosystem resilience                                                                          | 2.3.1.1. | Stabilization potential of forest ecosystems to ensure resilience against anthropogenic | Resilience class               | Calculated according to stand structure and terrain slope                                                                       | Forest site type, stand age, dominant tree species       | 1, 2                 |

| Section              | Group                                                                       | Class                                                                                                                                                                            | Code    | Indicator                                                                                  | Unit                              | Description/<br>data source                                                                                                  | Stand<br>attributes<br>used for<br>calculation       | Score<br>confidence* |
|----------------------|-----------------------------------------------------------------------------|----------------------------------------------------------------------------------------------------------------------------------------------------------------------------------|---------|--------------------------------------------------------------------------------------------|-----------------------------------|------------------------------------------------------------------------------------------------------------------------------|------------------------------------------------------|----------------------|
|                      |                                                                             |                                                                                                                                                                                  |         | (recreational)<br>pressure                                                                 |                                   |                                                                                                                              |                                                      |                      |
| Cultural<br>(biotic) | Physical and<br>experiential<br>interactions<br>with natural<br>environment | Characteristics of<br>living systems<br>that enable<br>activities<br>promoting<br>health,<br>recuperation or<br>enjoyment<br>through active or<br>immersive<br>interactions      | 3.1.1.1 | Suitability of the<br>forest<br>compartment to<br>provide<br>environment for<br>recreation | Recreational<br>suitability class | Calculated according<br>to stand structure,<br>proximity to<br>waterbodies, cities and<br>settlements and<br>pollution level | Dominant<br>tree species,<br>site type,<br>age group | 1                    |
|                      |                                                                             | Characteristics of<br>living systems<br>that enable<br>activities<br>promoting<br>health,<br>recuperation or<br>enjoyment<br>through passive<br>or observational<br>interactions | 3.1.1.2 | Visual<br>attractiveness of<br>forest stands                                               | Visual quality<br>class           | Calculated according<br>to stand structure and<br>type of the view (open,<br>closed)                                         | Tree species,<br>stand age                           | 2                    |

\*1 – LV focused, peer-reviewed literature; 2 – LV focused, “grey” literature; 3 - foreign literature; 4 - expert opinion (adjusted from Geange et al. [65])

**Table S2.** Trees and ground vegetation species suitable for phytoremediation. The first number shows possible habitat (1 – oligotrophic sites, 2 – mesotrophic sites, 3 – eutrophic sites), the second – occurrence (1- rarely, 2 – sometimes, 3 – often) (based on Straupe, unpublished data)

| Species                                 | Occurrence by site type      |                              |                           |                                  |                               |
|-----------------------------------------|------------------------------|------------------------------|---------------------------|----------------------------------|-------------------------------|
|                                         | Forests on dry mineral soils | Forests on wet mineral soils | Forests on wet peat soils | Forests on drained mineral soils | Forests on drained peat soils |
| <i>Pinus sylvestris</i> L.              | 1/3, 2/3                     | 1/3, 2/2                     | 1/3, 1/2                  | 1/3, 2/3                         | 1/3, 2/3                      |
| <i>Picea abies</i> (L.) H.Karst.        | 1/1, 2/2, 3/3                | 1/2,2/3, 3/1                 | 1/2, 2/2, 3/2             | 1/2, 2/3, 3/3                    | 1/2, 2/3, 3/2                 |
| <i>Quercus robur</i> L.                 | 3/2                          |                              |                           |                                  |                               |
| <i>Juniperus communis</i> L.            | 1/2, 2/3                     | 1/1, 2/1                     | 1/1, 2/3                  | 1/2                              | 1/2, 2/3                      |
| <i>Festuca ovina</i> L.s.str.           | 1/3                          |                              |                           |                                  |                               |
| <i>Festuca rubra</i> L. s.l.            |                              |                              |                           |                                  | 2/3                           |
| <i>Calamagrostis epigeios</i> (L.) Roth | 1/3                          |                              |                           |                                  |                               |
| <i>Juncus</i> sp.                       |                              | 2/3, 3/2                     |                           | 3/3                              |                               |
| <i>Caltha palustris</i> L.              |                              | 3/3                          | 2/3, 3/3                  |                                  |                               |
| <i>Iris pseudacorus</i> L.              |                              |                              | 2/2, 3/2                  |                                  |                               |
| <i>Scirpus sylvaticus</i> L.            |                              |                              | 2/3                       |                                  |                               |
| <i>Cirsium arvense</i> (L. ) Scop.      |                              |                              |                           |                                  | 2/3                           |

**Table S3.** Area of forests on dry mineral soils in each ES potential class, % by dominant tree species group. 0 – ES not provided, 1 – ES value very low, 2 – ES value low, 3 – ES value average, 4 – ES value high, 5 – ES value very high.

| Ecosystem service/<br>ES potential class<br>by dominant tree<br>species group | Pine |     |    |    |    |    | Spruce |     |     |    |    |    | Birch |     |    |    |    |    | Other |     |    |    |    |    |
|-------------------------------------------------------------------------------|------|-----|----|----|----|----|--------|-----|-----|----|----|----|-------|-----|----|----|----|----|-------|-----|----|----|----|----|
|                                                                               | 0    | 1   | 2  | 3  | 4  | 5  | 0      | 1   | 2   | 3  | 4  | 5  | 0     | 1   | 2  | 3  | 4  | 5  | 0     | 1   | 2  | 3  | 4  | 5  |
| Potential bilberry yield                                                      | 3    | 75  | 15 | 4  | 2  | 0  | 62     | 38  | 0   | 0  | 0  | 0  | 62    | 38  | 0  | 0  | 0  | 0  | 96    | 4   | 0  | 0  | 0  | 0  |
| Potential lingonberry yield                                                   | 45   | 41  | 12 | 2  | 0  | 0  | 99     | 1   | 0   | 0  | 0  | 0  | 99    | 1   | 0  | 0  | 0  | 0  | 100   | 0   | 0  | 0  | 0  | 0  |
| Habitat suitability moose                                                     | 0    | 34  | 58 | 0  | 0  | 9  | 0      | 0   | 100 | 0  | 0  | 0  | 0     | 0   | 58 | 42 | 1  | 0  | 0     | 19  | 37 | 9  | 15 | 20 |
| Habitat suitability red deer                                                  | 0    | 8   | 5  | 2  | 18 | 66 | 0      | 19  | 0   | 58 | 23 | 0  | 0     | 0   | 21 | 0  | 78 | 0  | 0     | 0   | 40 | 8  | 52 | 0  |
| Habitat suitability roe deer                                                  | 0    | 0   | 5  | 2  | 35 | 58 | 0      | 0   | 53  | 24 | 23 | 0  | 0     | 22  | 1  | 42 | 0  | 36 | 0     | 21  | 26 | 17 | 0  | 36 |
| Habitat suitability wild boar                                                 | 0    | 20  | 14 | 66 | 0  | 0  | 0      | 0   | 17  | 19 | 24 | 40 | 0     | 0   | 21 | 0  | 79 | 0  | 0     | 19  | 0  | 21 | 40 | 20 |
| Phytoremediation potential                                                    | 0    | 0   | 0  | 6  | 94 | 0  | 0      | 0   | 0   | 56 | 44 | 0  | 0     | 0   | 0  | 57 | 43 | 0  | 0     | 0   | 0  | 80 | 20 | 0  |
| Heavy metal stabilization potential                                           | 0    | 100 | 0  | 0  | 0  | 0  | 0      | 100 | 0   | 0  | 0  | 0  | 0     | 100 | 0  | 0  | 0  | 0  | 0     | 100 | 0  | 0  | 0  | 0  |
| Noise attenuation potential                                                   | 0    | 0   | 2  | 12 | 48 | 38 | 0      | 0   | 2   | 16 | 43 | 40 | 0     | 0   | 6  | 31 | 36 | 27 | 19    | 0   | 3  | 18 | 24 | 36 |
| Resilience against recreational pressure                                      | 0    | 4   | 10 | 12 | 22 | 53 | 0      | 0   | 34  | 19 | 36 | 11 | 0     | 0   | 0  | 0  | 12 | 88 | 0     | 35  | 0  | 0  | 9  | 56 |
| Visual quality                                                                | 0    | 0   | 0  | 40 | 33 | 27 | 0      | 0   | 41  | 59 | 0  | 0  | 0     | 0   | 3  | 57 | 40 | 0  | 0     | 19  | 1  | 57 | 23 | 0  |
| Recreational suitability                                                      | 0    | 3   | 27 | 26 | 44 | 0  | 0      | 53  | 47  | 0  | 0  | 0  | 0     | 36  | 31 | 32 | 0  | 0  | 0     | 66  | 33 | 0  | 1  | 0  |

**Table S4.** Area of forests on wet mineral soils in each ES potential class, % by dominant tree species group. 0 – ES not provided, 1 – ES value very low, 2 – ES value low, 3 – ES value average, 4 – ES value high, 5 – ES value very high.

| Ecosystem service/<br>ES potential class<br>by dominant tree<br>species group | Pine |    |    |    |    |    | Spruce |     |     |    |    |    | Birch |     |    |    |    |    | Other |     |    |    |    |    |
|-------------------------------------------------------------------------------|------|----|----|----|----|----|--------|-----|-----|----|----|----|-------|-----|----|----|----|----|-------|-----|----|----|----|----|
|                                                                               | 0    | 1  | 2  | 3  | 4  | 5  | 0      | 1   | 2   | 3  | 4  | 5  | 0     | 1   | 2  | 3  | 4  | 5  | 0     | 1   | 2  | 3  | 4  | 5  |
| Potential bilberry yield                                                      | 54   | 18 | 10 | 7  | 7  | 4  | 98     | 1   | 0   | 0  | 0  | 0  | 99    | 1   | 0  | 0  | 0  | 0  | 100   | 0   | 0  | 0  | 0  | 0  |
| Potential lingonberry yield                                                   | 53   | 24 | 17 | 6  | 0  | 0  | 98     | 1   | 0   | 0  | 0  | 0  | 99    | 1   | 0  | 0  | 0  | 0  | 100   | 0   | 0  | 0  | 0  | 0  |
| Habitat suitability moose                                                     | 0    | 51 | 43 | 0  | 0  | 5  | 0      | 0   | 100 | 0  | 0  | 0  | 0     | 0   | 39 | 55 | 7  | 0  | 0     | 19  | 37 | 20 | 16 | 7  |
| Habitat suitability red deer                                                  | 0    | 6  | 3  | 5  | 37 | 49 | 0      | 17  | 0   | 58 | 25 | 0  | 0     | 0   | 16 | 2  | 82 | 0  | 0     | 0   | 41 | 7  | 52 | 0  |
| Habitat suitability roe deer                                                  | 0    | 0  | 3  | 5  | 49 | 43 | 0      | 0   | 34  | 41 | 25 | 0  | 0     | 17  | 7  | 55 | 0  | 22 | 0     | 23  | 29 | 26 | 0  | 21 |
| Habitat suitability wild boar                                                 | 0    | 42 | 9  | 49 | 0  | 0  | 0      | 0   | 8   | 17 | 41 | 33 | 0     | 0   | 16 | 0  | 84 | 0  | 0     | 19  | 0  | 22 | 51 | 7  |
| Phytoremediation potential                                                    | 0    | 0  | 4  | 43 | 52 | 0  | 0      | 3   | 35  | 2  | 60 | 0  | 0     | 6   | 45 | 1  | 48 | 0  | 0     | 12  | 65 | 1  | 22 | 0  |
| Heavy metal stabilization potential                                           | 0    | 4  | 53 | 43 | 0  | 0  | 0      | 0   | 95  | 5  | 0  | 0  | 0     | 0   | 92 | 8  | 0  | 0  | 0     | 0   | 87 | 13 | 0  | 0  |
| Noise attenuation potential                                                   | 0    | 0  | 2  | 12 | 46 | 41 | 0      | 0   | 1   | 13 | 38 | 48 | 0     | 0   | 6  | 28 | 37 | 28 | 19    | 0   | 5  | 24 | 27 | 24 |
| Resilience against recreational pressure                                      | 0    | 11 | 10 | 40 | 38 | 0  | 0      | 26  | 43  | 27 | 4  | 0  | 0     | 0   | 5  | 12 | 31 | 52 | 0     | 37  | 2  | 7  | 14 | 40 |
| Visual quality                                                                | 0    | 0  | 0  | 36 | 43 | 21 | 0      | 0   | 25  | 75 | 0  | 0  | 0     | 0   | 2  | 50 | 48 | 0  | 0     | 19  | 1  | 48 | 32 | 0  |
| Recreational suitability                                                      | 0    | 57 | 43 | 0  | 0  | 0  | 0      | 100 | 0   | 0  | 0  | 0  | 0     | 100 | 0  | 0  | 0  | 0  | 0     | 100 | 0  | 0  | 0  | 0  |

**Table S5.** Area of forests on wet peat soils in each ES potential class, % by dominant tree species group. 0 – ES not provided, 1 – ES value very low, 2 – ES value low, 3 – ES value average, 4 – ES value high, 5 – ES value very high.

| Ecosystem<br>service/<br>ES potential class<br>by dominant tree<br>species group | Pine |    |    |    |    |    | Spruce |     |     |    |    |    | Birch |     |    |    |     |    | Other |     |    |    |    |    |
|----------------------------------------------------------------------------------|------|----|----|----|----|----|--------|-----|-----|----|----|----|-------|-----|----|----|-----|----|-------|-----|----|----|----|----|
|                                                                                  | 0    | 1  | 2  | 3  | 4  | 5  | 0      | 1   | 2   | 3  | 4  | 5  | 0     | 1   | 2  | 3  | 4   | 5  | 0     | 1   | 2  | 3  | 4  | 5  |
| Potential bilberry yield                                                         | 100  | 0  | 0  | 0  | 0  | 0  | 100    | 0   | 0   | 0  | 0  | 0  | 100   | 0   | 0  | 0  | 0   | 0  | 100   | 0   | 0  | 0  | 0  | 0  |
| Potential lingonberry yield                                                      | 100  | 0  | 0  | 0  | 0  | 0  | 100    | 0   | 0   | 0  | 0  | 0  | 100   | 0   | 0  | 0  | 0   | 0  | 100   | 0   | 0  | 0  | 0  | 0  |
| Habitat suitability moose                                                        | 0    | 50 | 0  | 0  | 49 | 1  | 0      | 0   | 100 | 0  | 0  | 0  | 0     | 0   | 12 | 0  | 88  | 0  | 0     | 20  | 10 | 1  | 68 | 1  |
| Habitat suitability red deer                                                     | 0    | 1  | 0  | 4  | 47 | 48 | 0      | 18  | 0   | 43 | 38 | 0  | 0     | 0   | 0  | 15 | 85  | 0  | 0     | 0   | 20 | 13 | 67 | 0  |
| Habitat suitability roe deer                                                     | 0    | 0  | 0  | 4  | 48 | 48 | 0      | 0   | 30  | 31 | 38 | 0  | 0     | 12  | 88 | 0  | 0   | 0  | 0     | 10  | 87 | 2  | 0  | 1  |
| Habitat suitability wild boar                                                    | 0    | 49 | 0  | 50 | 0  | 0  | 0      | 0   | 5   | 18 | 31 | 46 | 0     | 0   | 0  | 0  | 100 | 0  | 0     | 20  | 0  | 0  | 79 | 1  |
| Phytoremediation potential                                                       | 0    | 0  | 1  | 50 | 50 | 0  | 0      | 2   | 34  | 2  | 63 | 0  | 0     | 2   | 42 | 2  | 54  | 0  | 0     | 8   | 74 | 1  | 17 | 0  |
| Heavy metal stabilization potential                                              | 0    | 0  | 0  | 0  | 1  | 99 | 0      | 0   | 0   | 0  | 35 | 65 | 0     | 0   | 0  | 0  | 44  | 56 | 0     | 0   | 0  | 0  | 82 | 18 |
| Noise attenuation potential                                                      | 0    | 0  | 2  | 15 | 47 | 36 | 0      | 0   | 2   | 14 | 33 | 52 | 0     | 1   | 7  | 27 | 39  | 26 | 20    | 1   | 7  | 26 | 30 | 16 |
| Resilience against recreational pressure                                         | 0    | 31 | 43 | 26 | 0  | 0  | 0      | 84  | 15  | 0  | 0  | 0  | 0     | 5   | 8  | 63 | 24  | 0  | 0     | 28  | 6  | 46 | 20 | 1  |
| Visual quality                                                                   | 0    | 0  | 0  | 29 | 63 | 9  | 0      | 0   | 30  | 70 | 0  | 0  | 0     | 0   | 1  | 53 | 45  | 0  | 0     | 20  | 1  | 43 | 36 | 0  |
| Recreational suitability                                                         | 0    | 44 | 56 | 0  | 0  | 0  | 0      | 100 | 0   | 0  | 0  | 0  | 0     | 100 | 0  | 0  | 0   | 0  | 0     | 100 | 0  | 0  | 0  | 0  |

**Table S6.** Area of forests on drained mineral soils in each ES potential class, % by dominant tree species group. 0 – ES not provided, 1 – ES value very low, 2 – ES value low, 3 – ES value average, 4 – ES value high, 5 – ES value very high.

| Ecosystem<br>service/<br>ES potential class<br>by dominant tree<br>species group | Pine |    |    |    |    |    | Spruce |    |     |    |    |    | Birch |    |    |    |    |    | Other |    |    |    |    |    |
|----------------------------------------------------------------------------------|------|----|----|----|----|----|--------|----|-----|----|----|----|-------|----|----|----|----|----|-------|----|----|----|----|----|
|                                                                                  | 0    | 1  | 2  | 3  | 4  | 5  | 0      | 1  | 2   | 3  | 4  | 5  | 0     | 1  | 2  | 3  | 4  | 5  | 0     | 1  | 2  | 3  | 4  | 5  |
| Potential bilberry yield                                                         | 97   | 3  | 0  | 0  | 0  | 0  | 100    | 0  | 0   | 0  | 0  | 0  | 100   | 0  | 0  | 0  | 0  | 0  | 100   | 0  | 0  | 0  | 0  | 0  |
| Potential lingonberry yield                                                      | 97   | 2  | 1  | 0  | 0  | 0  | 100    | 0  | 0   | 0  | 0  | 0  | 100   | 0  | 0  | 0  | 0  | 0  | 100   | 0  | 0  | 0  | 0  | 0  |
| Habitat suitability moose                                                        | 0    | 18 | 76 | 0  | 1  | 6  | 0      | 0  | 100 | 0  | 0  | 0  | 0     | 0  | 32 | 28 | 39 | 0  | 0     | 22 | 19 | 7  | 39 | 13 |
| Habitat suitability red deer                                                     | 0    | 8  | 6  | 0  | 3  | 82 | 0      | 19 | 0   | 58 | 22 | 0  | 0     | 0  | 8  | 9  | 83 | 0  | 0     | 0  | 26 | 24 | 50 | 0  |
| Habitat suitability roe deer                                                     | 0    | 0  | 6  | 0  | 17 | 77 | 0      | 0  | 42  | 35 | 22 | 0  | 0     | 18 | 39 | 28 | 0  | 14 | 0     | 16 | 55 | 13 | 0  | 16 |
| Habitat suitability wild boar                                                    | 0    | 3  | 14 | 82 | 0  | 0  | 0      | 0  | 12  | 19 | 35 | 34 | 0     | 0  | 8  | 0  | 92 | 0  | 0     | 22 | 0  | 4  | 61 | 13 |
| Phytoremediation potential                                                       | 0    | 0  | 1  | 64 | 0  | 35 | 0      | 0  | 34  | 65 | 0  | 1  | 0     | 0  | 48 | 51 | 0  | 1  | 0     | 0  | 70 | 29 | 0  | 1  |
| Heavy metal stabilization potential                                              | 0    | 62 | 38 | 0  | 0  | 0  | 0      | 99 | 1   | 0  | 0  | 0  | 0     | 99 | 1  | 0  | 0  | 0  | 0     | 99 | 1  | 0  | 0  | 0  |
| Noise attenuation potential                                                      | 0    | 0  | 2  | 9  | 47 | 43 | 0      | 0  | 1   | 14 | 42 | 43 | 0     | 0  | 6  | 31 | 38 | 25 | 22    | 0  | 4  | 20 | 25 | 28 |
| Resilience against recreational pressure                                         | 0    | 5  | 12 | 21 | 35 | 27 | 0      | 23 | 20  | 48 | 9  | 0  | 0     | 0  | 0  | 10 | 15 | 75 | 0     | 38 | 0  | 9  | 13 | 40 |
| Visual quality                                                                   | 0    | 0  | 0  | 40 | 36 | 24 | 0      | 0  | 30  | 70 | 0  | 0  | 0     | 0  | 3  | 48 | 50 | 0  | 0     | 22 | 1  | 51 | 26 | 0  |
| Recreational suitability                                                         | 0    | 21 | 40 | 39 | 0  | 0  | 0      | 57 | 43  | 0  | 0  | 0  | 0     | 31 | 69 | 0  | 0  | 0  | 0     | 82 | 18 | 0  | 0  | 0  |



**Table S7.** Area of forests on drained peat soils in each ES potential class, % by dominant tree species group. 0 – ES not provided, 1 – ES value very low, 2 – ES value low, 3 – ES value average, 4 – ES value high, 5 – ES value very high.

| Ecosystem service/<br>ES potential class<br>by dominant tree species group | Pine |    |    |    |    |    | Spruce |    |     |    |    |    | Birch |    |    |    |     |    | Other |    |    |    |    |    |
|----------------------------------------------------------------------------|------|----|----|----|----|----|--------|----|-----|----|----|----|-------|----|----|----|-----|----|-------|----|----|----|----|----|
|                                                                            | 0    | 1  | 2  | 3  | 4  | 5  | 0      | 1  | 2   | 3  | 4  | 5  | 0     | 1  | 2  | 3  | 4   | 5  | 0     | 1  | 2  | 3  | 4  | 5  |
| Potential bilberry yield                                                   | 56   | 27 | 9  | 3  | 3  | 2  | 98     | 1  | 0   | 0  | 0  | 0  | 97    | 3  | 0  | 0  | 0   | 0  | 100   | 0  | 0  | 0  | 0  | 0  |
| Potential lingonberry yield                                                | 55   | 35 | 9  | 1  | 0  | 0  | 98     | 2  | 0   | 0  | 0  | 0  | 97    | 3  | 0  | 0  | 0   | 0  | 100   | 0  | 0  | 0  | 0  | 0  |
| Habitat suitability moose                                                  | 0    | 22 | 0  | 0  | 75 | 3  | 0      | 0  | 100 | 0  | 0  | 0  | 0     | 0  | 25 | 0  | 75  | 0  | 0     | 32 | 16 | 3  | 41 | 8  |
| Habitat suitability red deer                                               | 0    | 4  | 0  | 4  | 17 | 75 | 0      | 17 | 0   | 49 | 34 | 0  | 0     | 0  | 0  | 15 | 85  | 0  | 0     | 0  | 32 | 11 | 56 | 0  |
| Habitat suitability roe deer                                               | 0    | 0  | 0  | 4  | 21 | 74 | 0      | 0  | 39  | 27 | 34 | 0  | 0     | 25 | 75 | 0  | 0   | 0  | 0     | 16 | 72 | 4  | 0  | 8  |
| Habitat suitability wild boar                                              | 0    | 18 | 4  | 78 | 0  | 0  | 0      | 0  | 10  | 17 | 27 | 46 | 0     | 0  | 0  | 0  | 100 | 0  | 0     | 32 | 0  | 0  | 60 | 8  |
| Phytoremediation potential                                                 | 0    | 1  | 0  | 27 | 18 | 54 | 0      | 35 | 0   | 2  | 0  | 63 | 0     | 44 | 0  | 3  | 1   | 53 | 0     | 70 | 0  | 2  | 1  | 28 |
| Heavy metal stabilization potential                                        | 0    | 0  | 0  | 0  | 55 | 45 | 0      | 0  | 0   | 0  | 98 | 2  | 0     | 0  | 0  | 0  | 97  | 3  | 0     | 0  | 0  | 0  | 98 | 2  |
| Noise attenuation potential                                                | 0    | 0  | 1  | 11 | 48 | 39 | 0      | 0  | 2   | 16 | 40 | 43 | 0     | 0  | 7  | 31 | 37  | 24 | 32    | 0  | 5  | 22 | 23 | 17 |
| Resilience against recreational pressure                                   | 0    | 10 | 23 | 40 | 28 | 0  | 0      | 41 | 45  | 14 | 0  | 0  | 0     | 0  | 11 | 16 | 56  | 17 | 0     | 36 | 10 | 13 | 34 | 7  |
| Visual quality                                                             | 0    | 0  | 0  | 35 | 42 | 22 | 0      | 0  | 30  | 70 | 0  | 0  | 0     | 0  | 3  | 49 | 48  | 0  | 0     | 32 | 2  | 43 | 23 | 0  |
| Recreational suitability                                                   | 0    | 11 | 36 | 53 | 0  | 0  | 0      | 52 | 48  | 0  | 0  | 0  | 0     | 30 | 70 | 0  | 0   | 0  | 0     | 73 | 27 | 0  | 0  | 0  |

**Figure S1.** Potential bilberry (*Vaccinium myrtillus*) yield. Ecosystem service median values, aggregated on a 5x5 km grid.

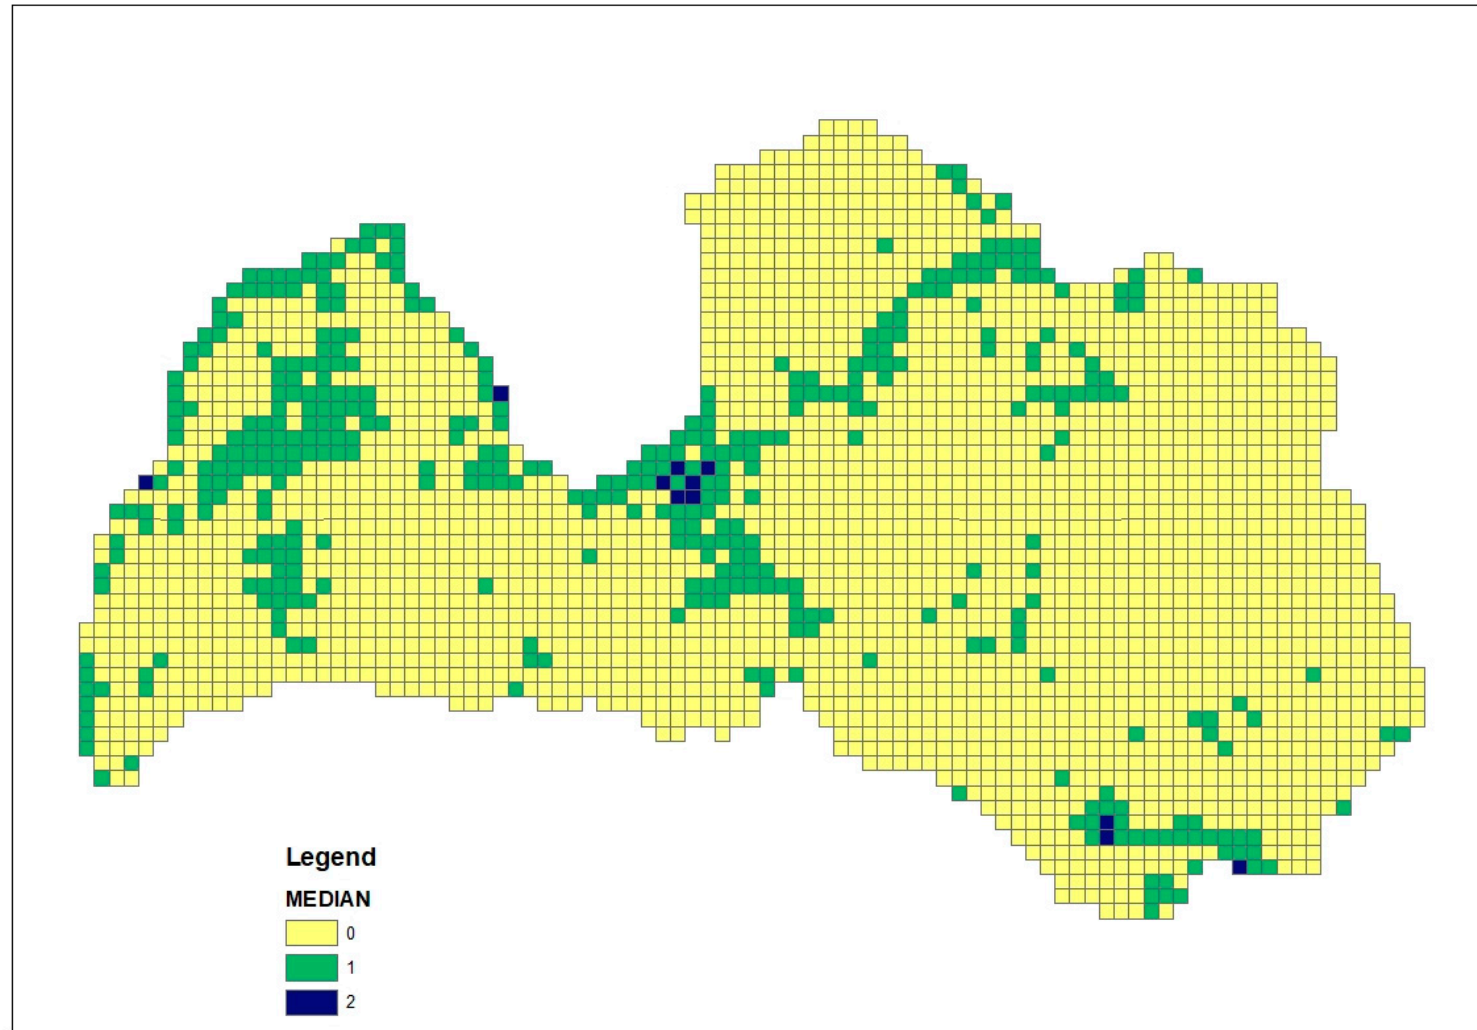

**Figure S2.** Potential lingonberry (*Vaccinium vitis-idaea*) yield. Ecosystem service median values, aggregated on a 5x5 km grid.

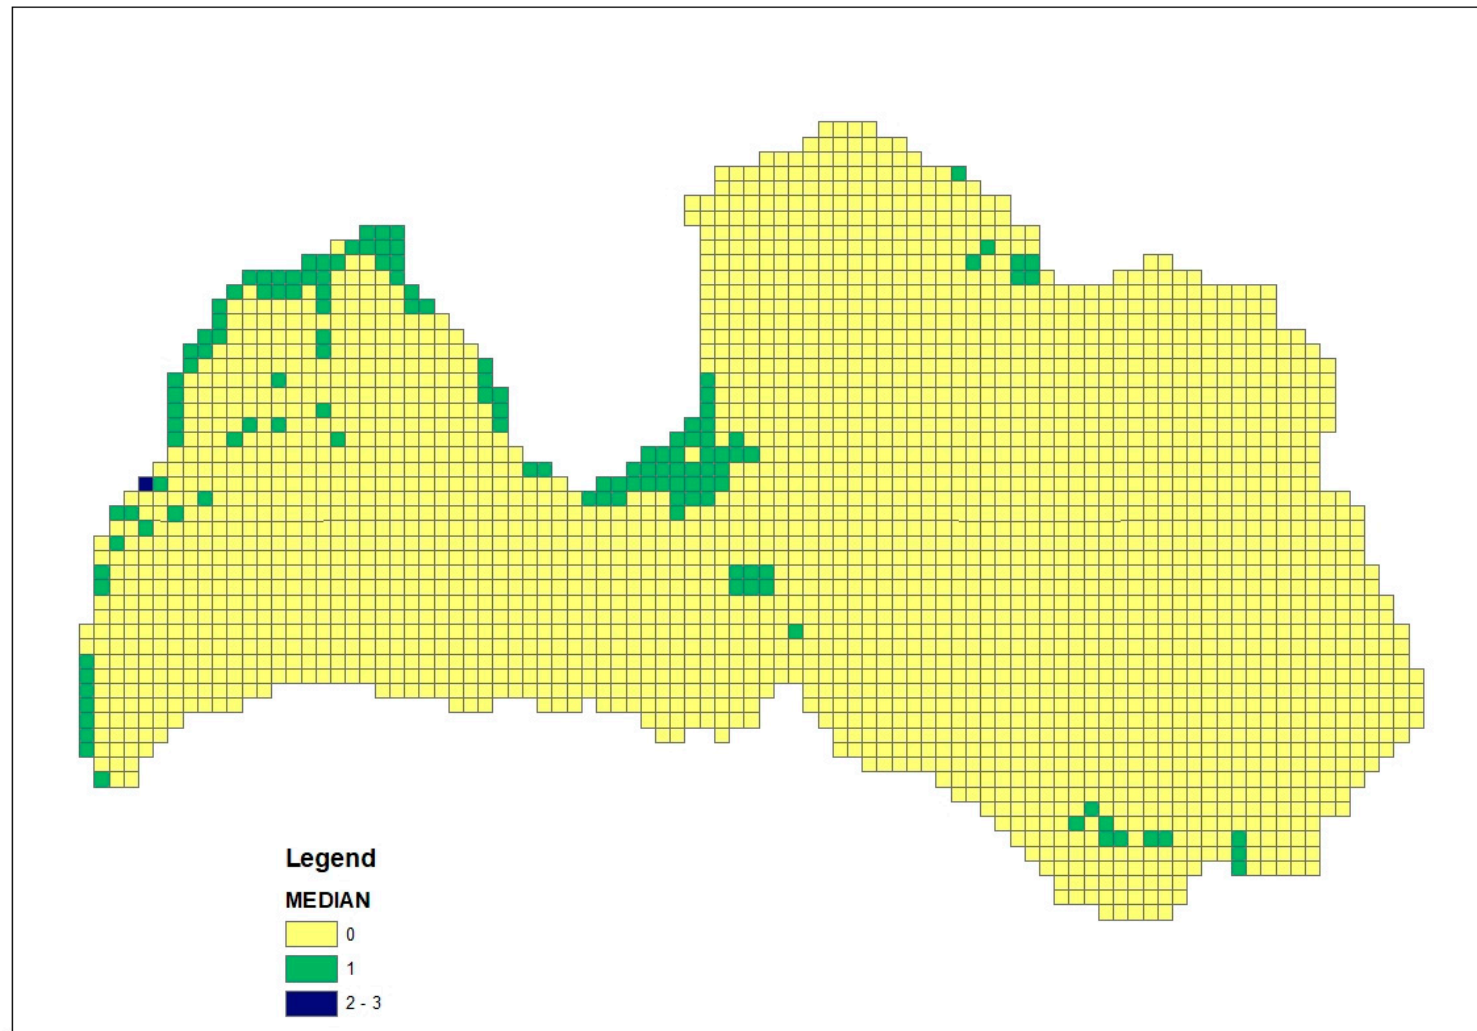

**Figure S3.** Habitat suitability for moose (*Alces alces*). Ecosystem service median values, aggregated on a 5x5 km grid.

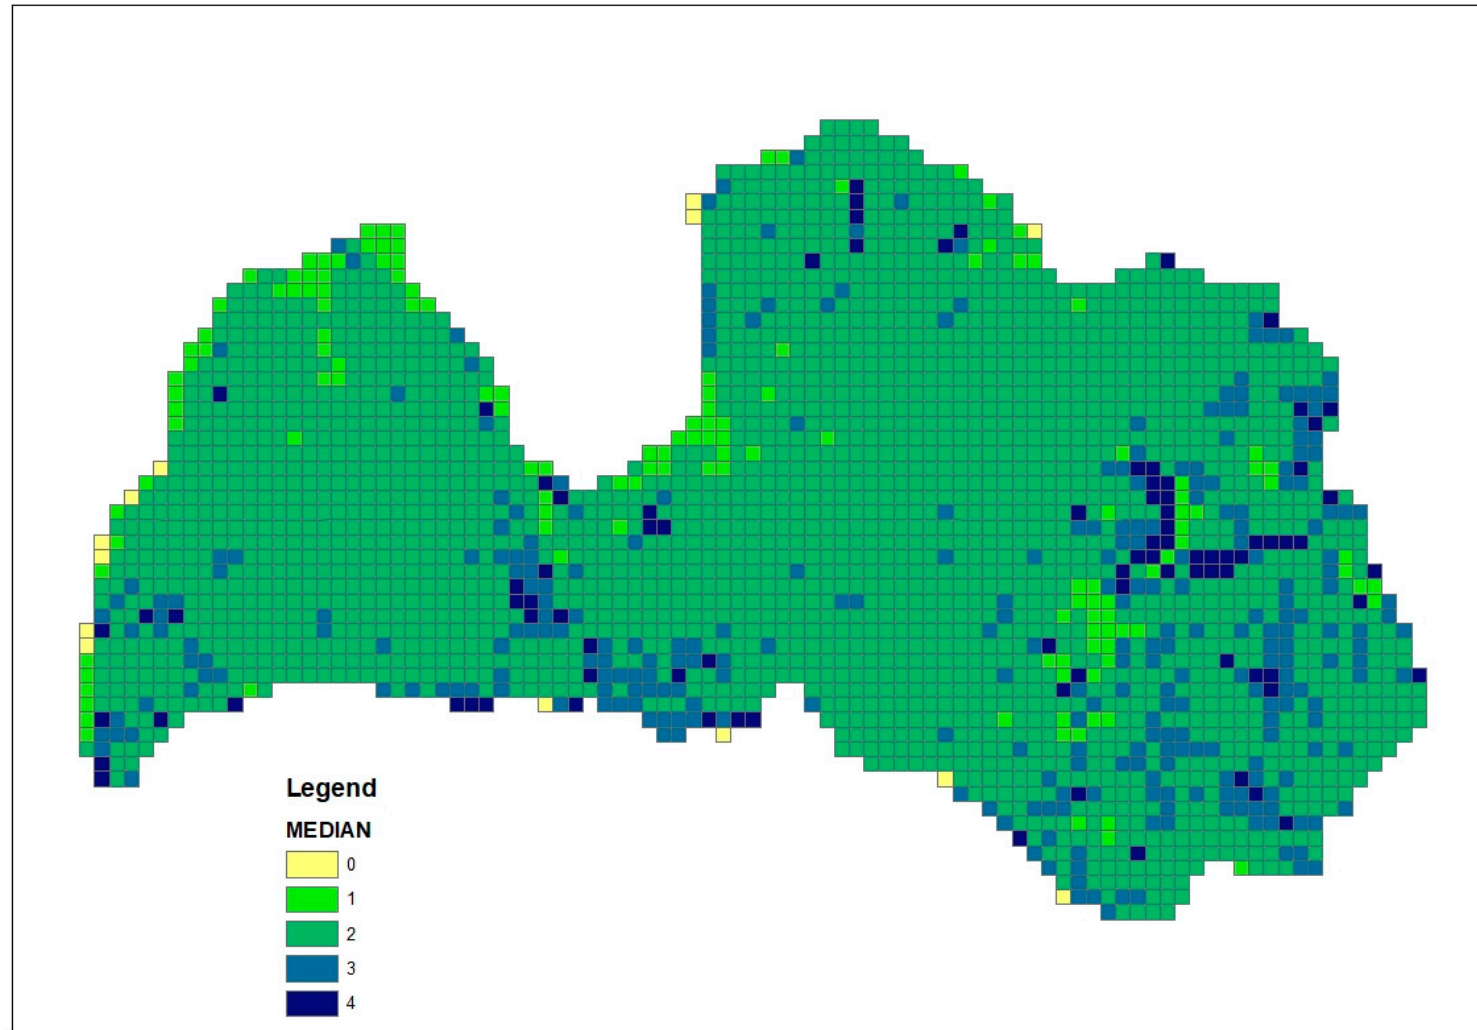

**Figure S4.** Habitat suitability for red deer (*Cervus elaphus*). Ecosystem service median values, aggregated on a 5x5 km grid.

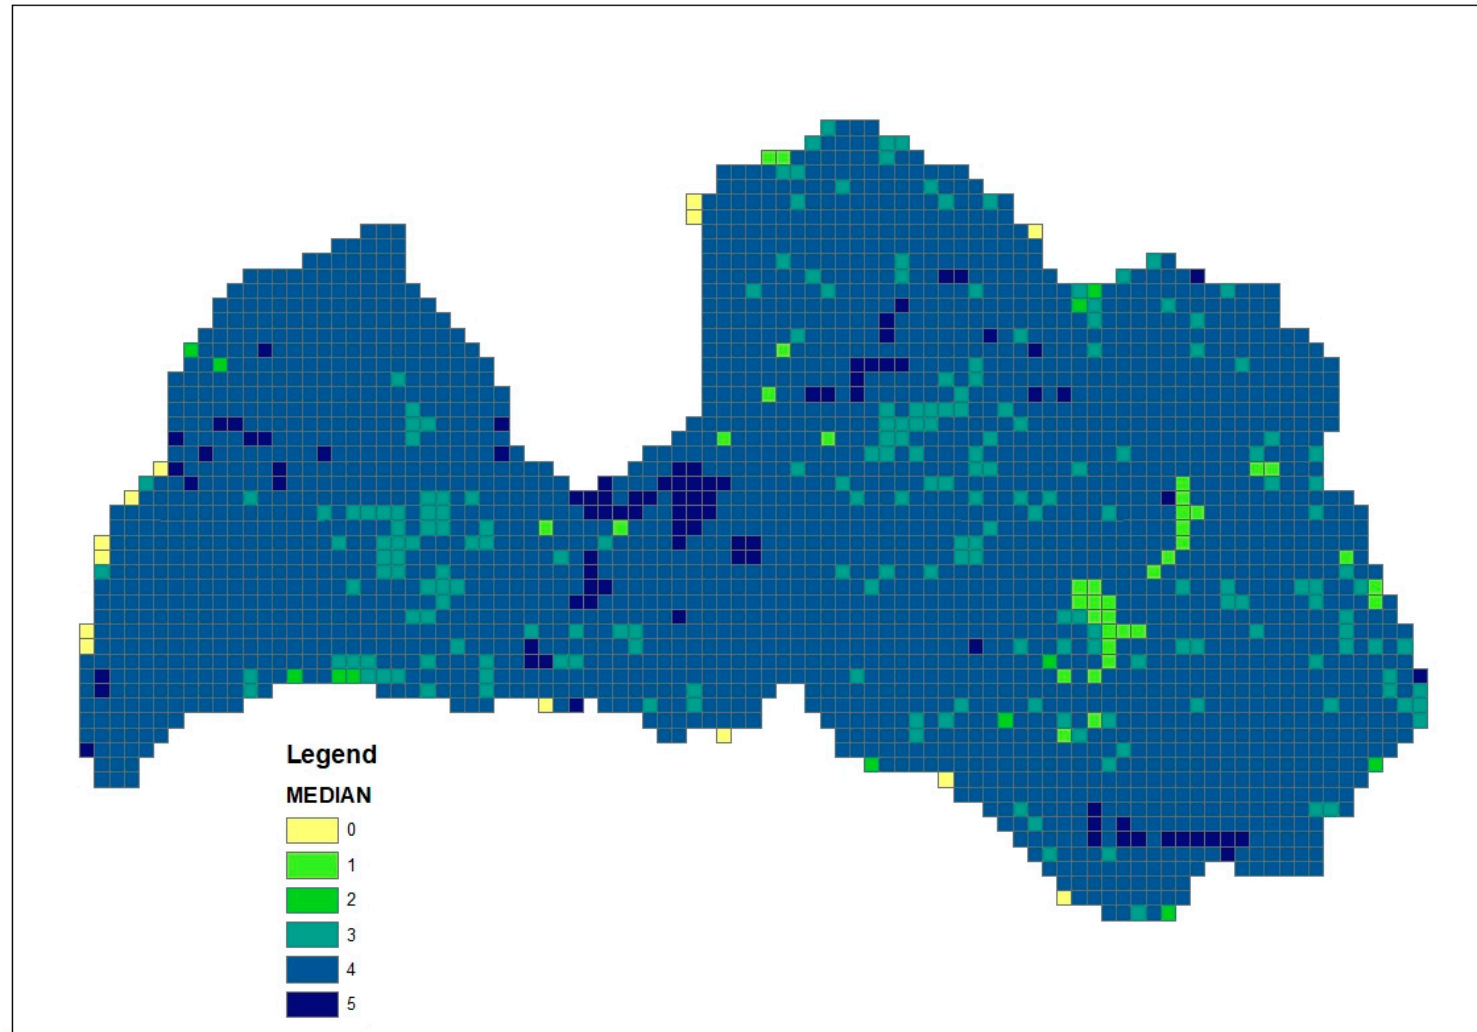



**Figure S5.** Habitat suitability for roe deer (*Capreolus capreolus*). Ecosystem service median values, aggregated on a 5x5 km grid.

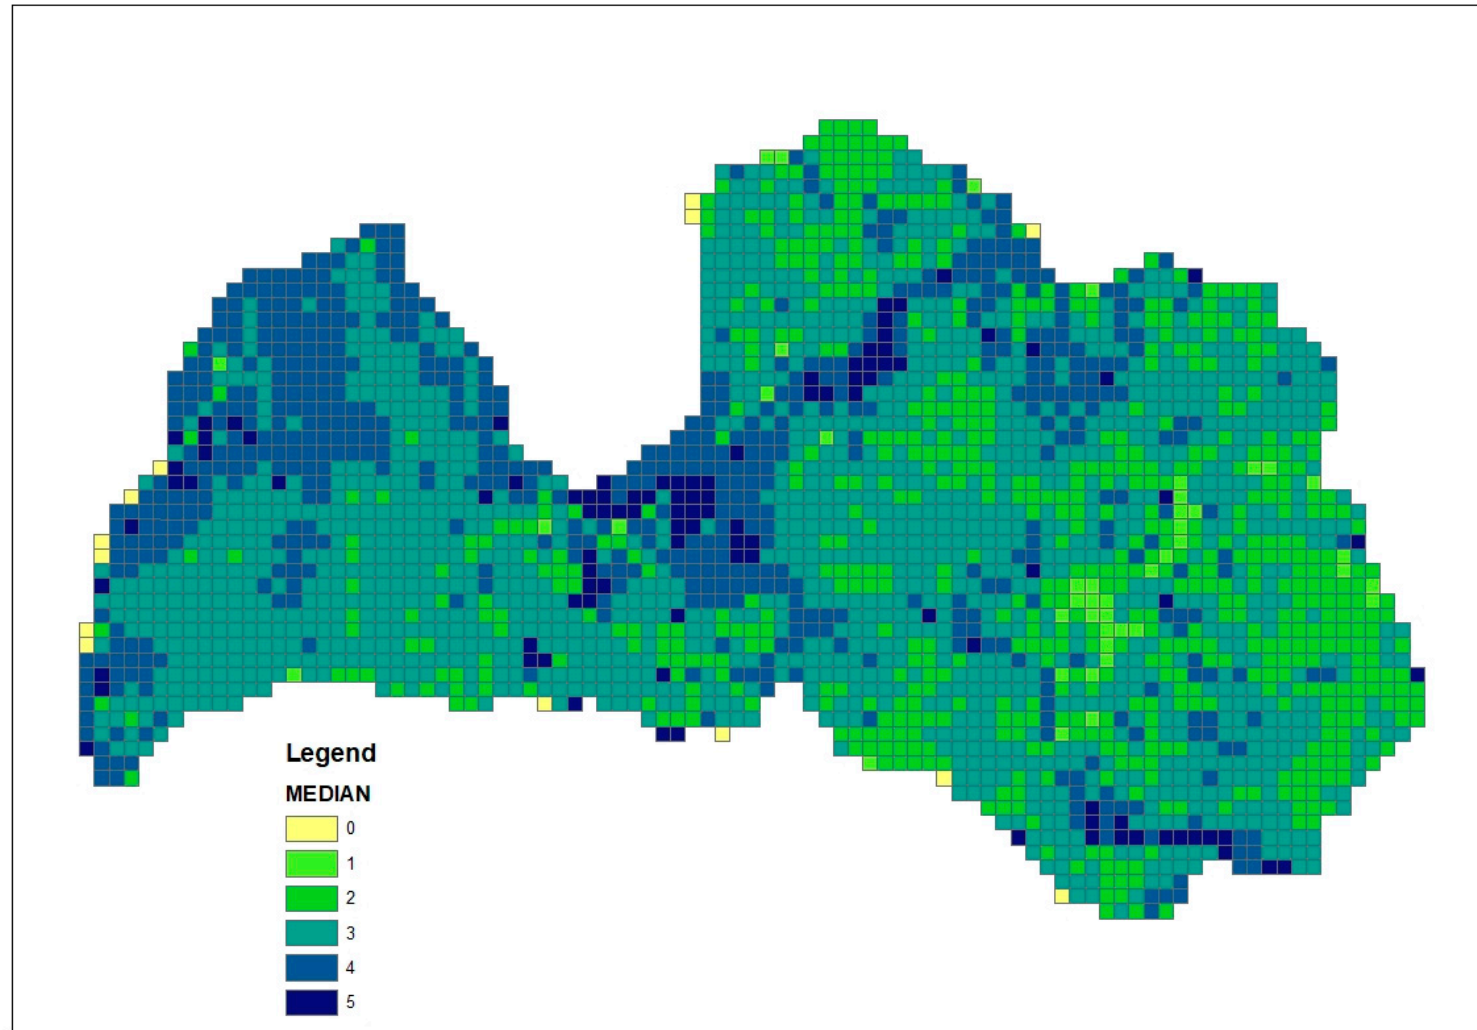

**Figure S6.** Habitat suitability for wild boar (*Sus scrofa*). Ecosystem service median values, aggregated on a 5x5 km grid.

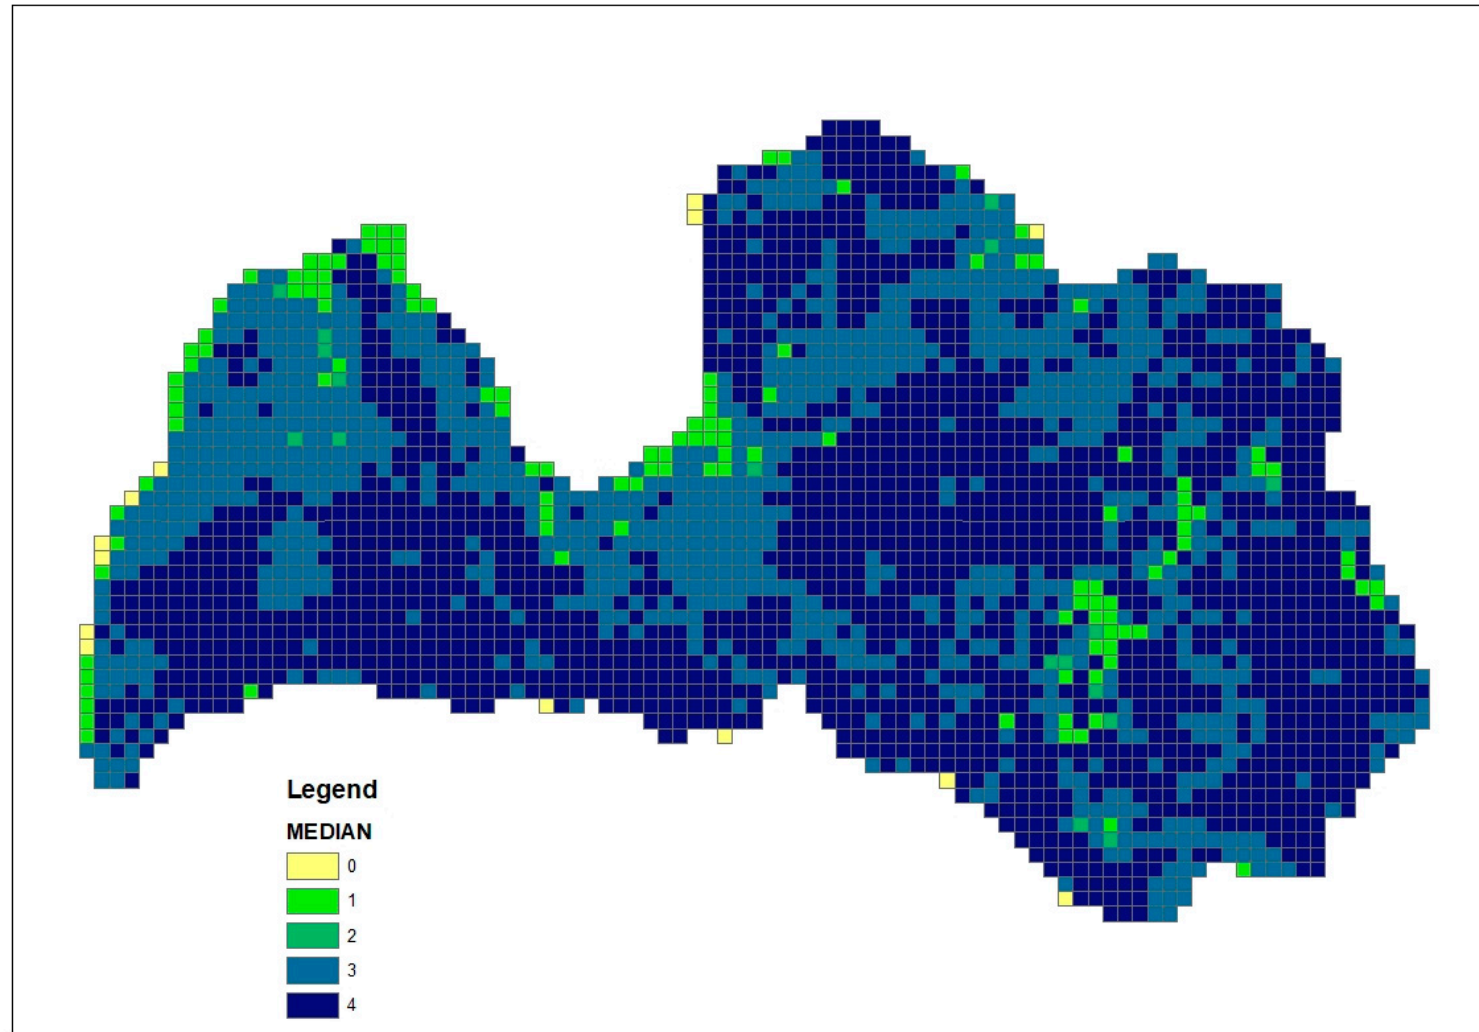

**Figure S7.** Potential phytoremediation by trees and ground vegetation. Ecosystem service median values, aggregated on a 5x5 km grid.

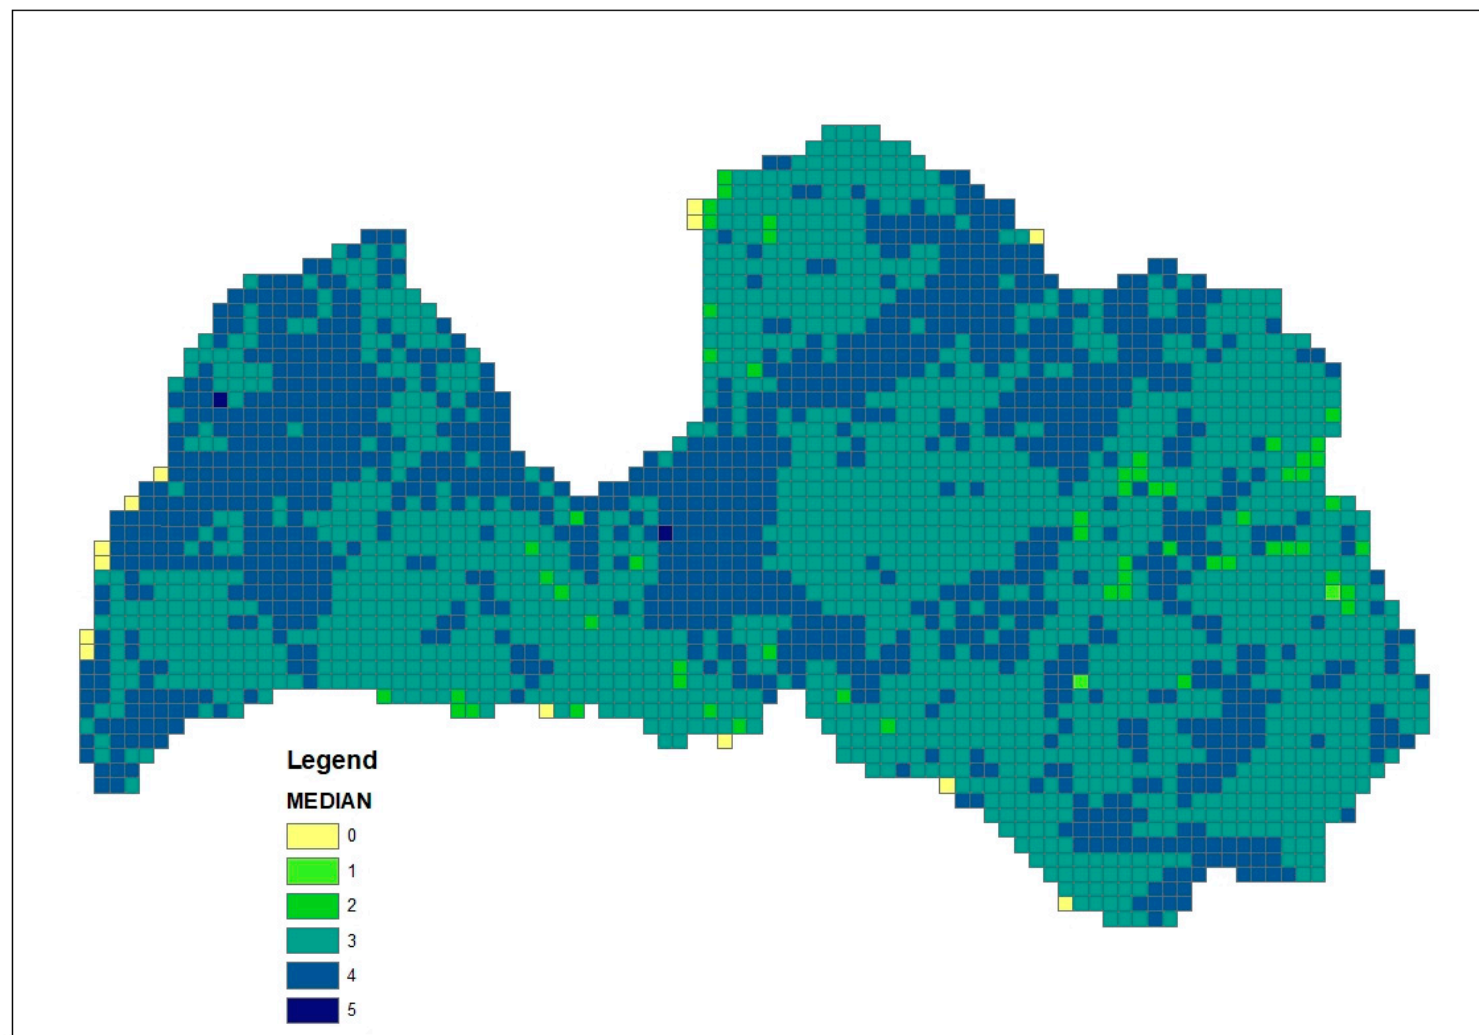



**Figure S8.** Noise attenuation potential. Ecosystem service median values, aggregated on a 5x5 km grid.

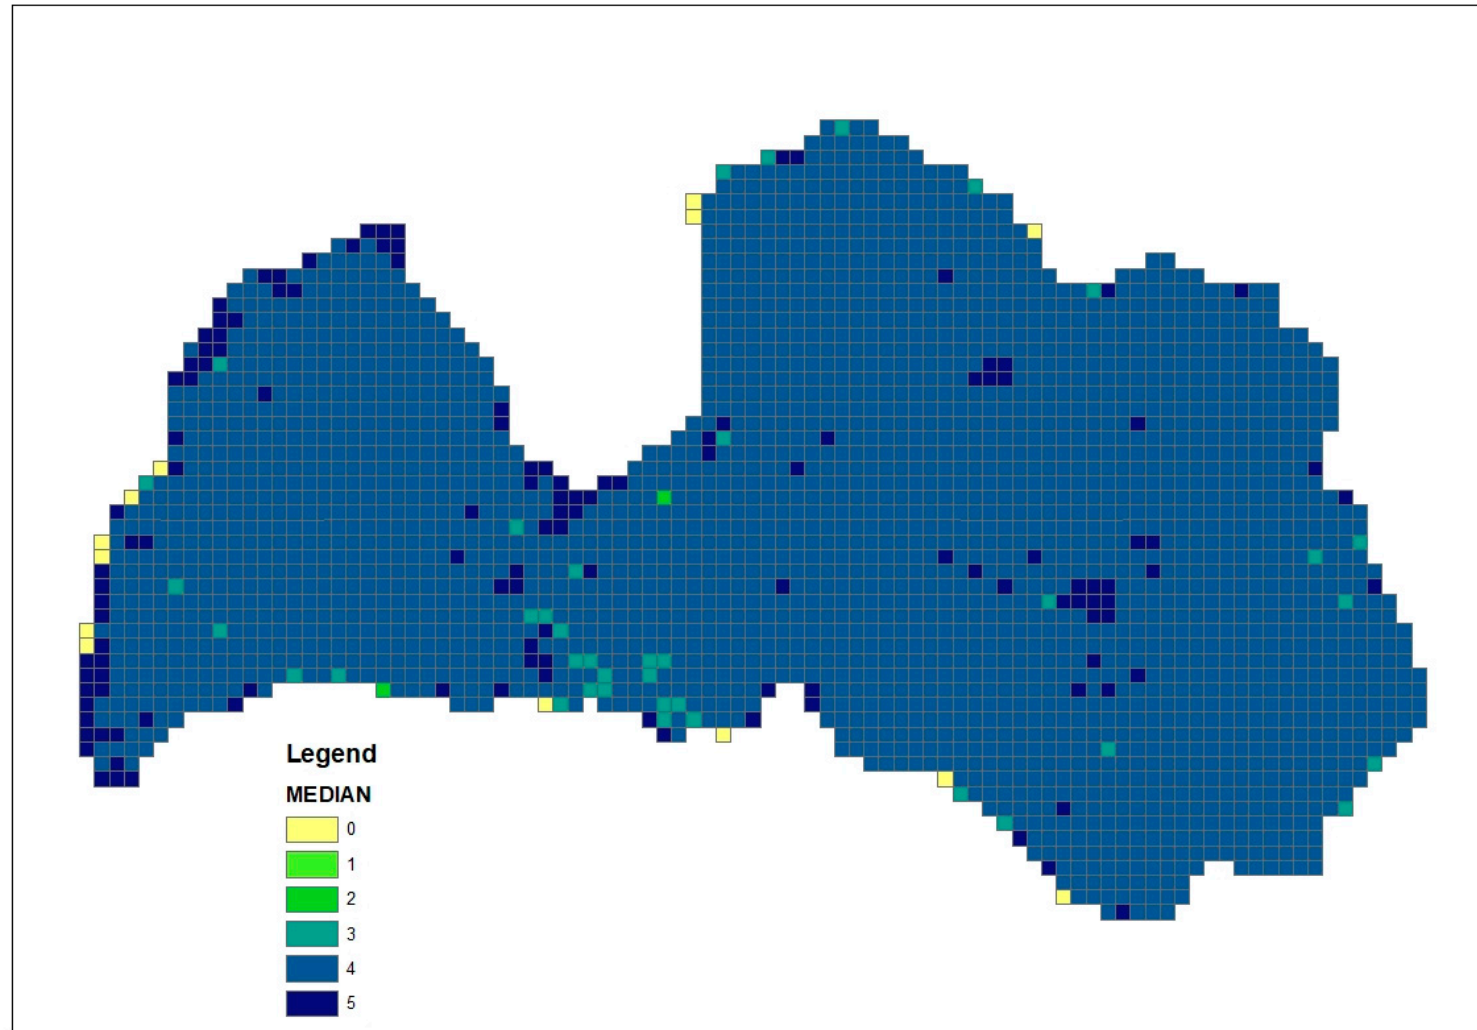

**Figure S9.** Stabilization potential of toxic heavy metals (Hg, Pb, Cd). Ecosystem service median values, aggregated on a 5x5 km grid.

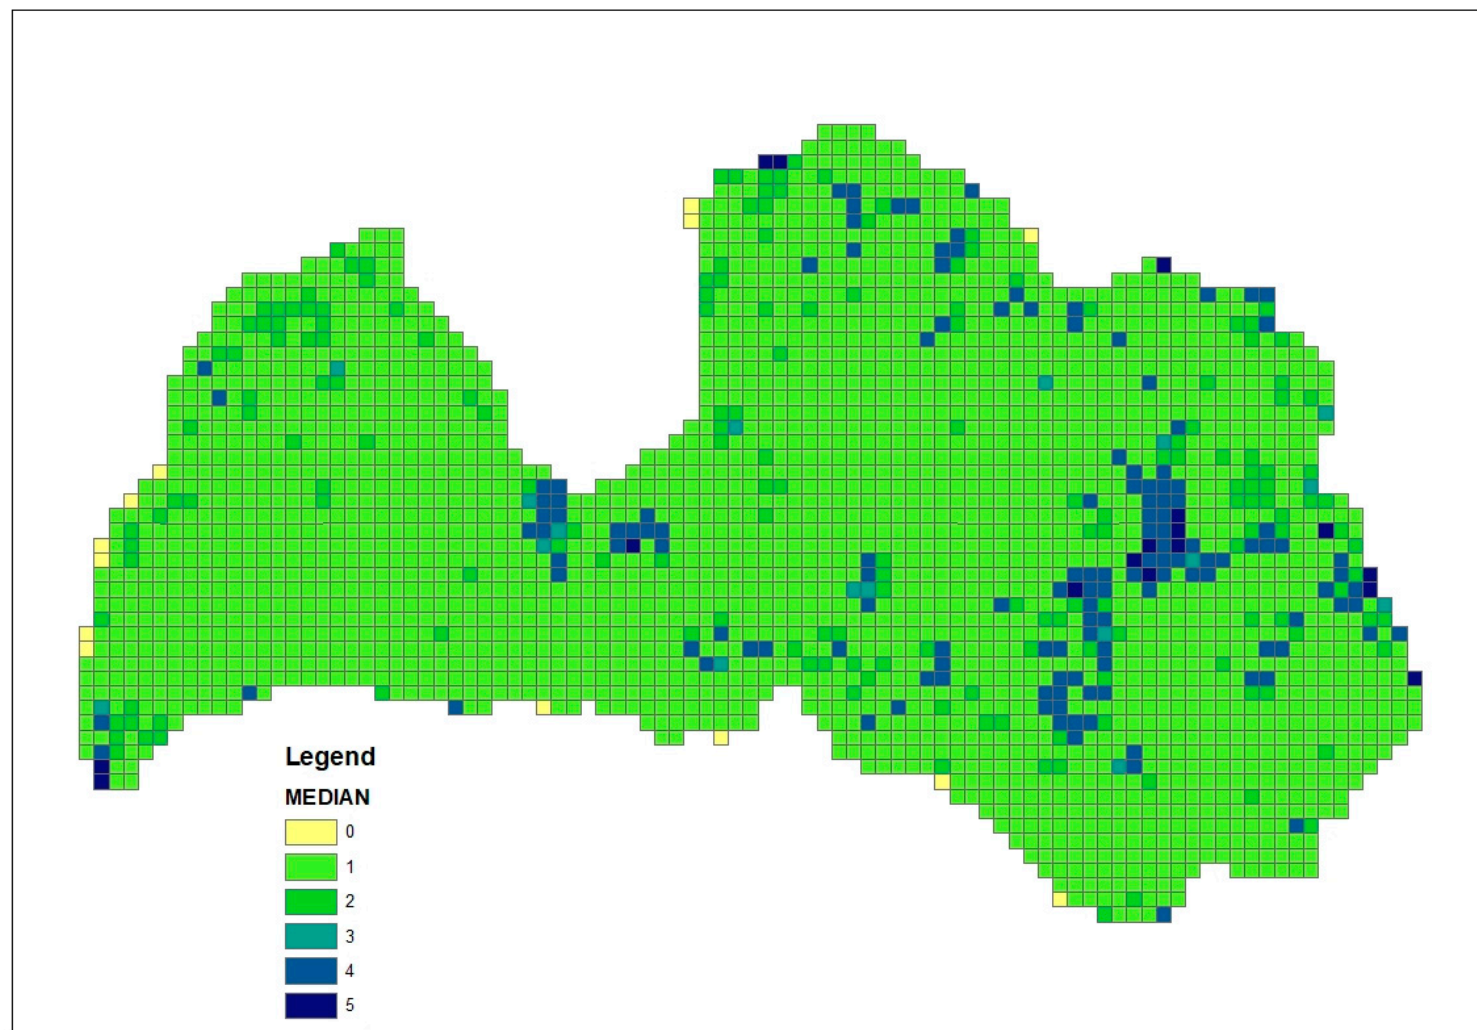

**Figure S10.** Stabilization potential of forest ecosystems to ensure resilience against anthropogenic (recreational) pressure. Ecosystem service median values, aggregated on a 5x5 km grid.

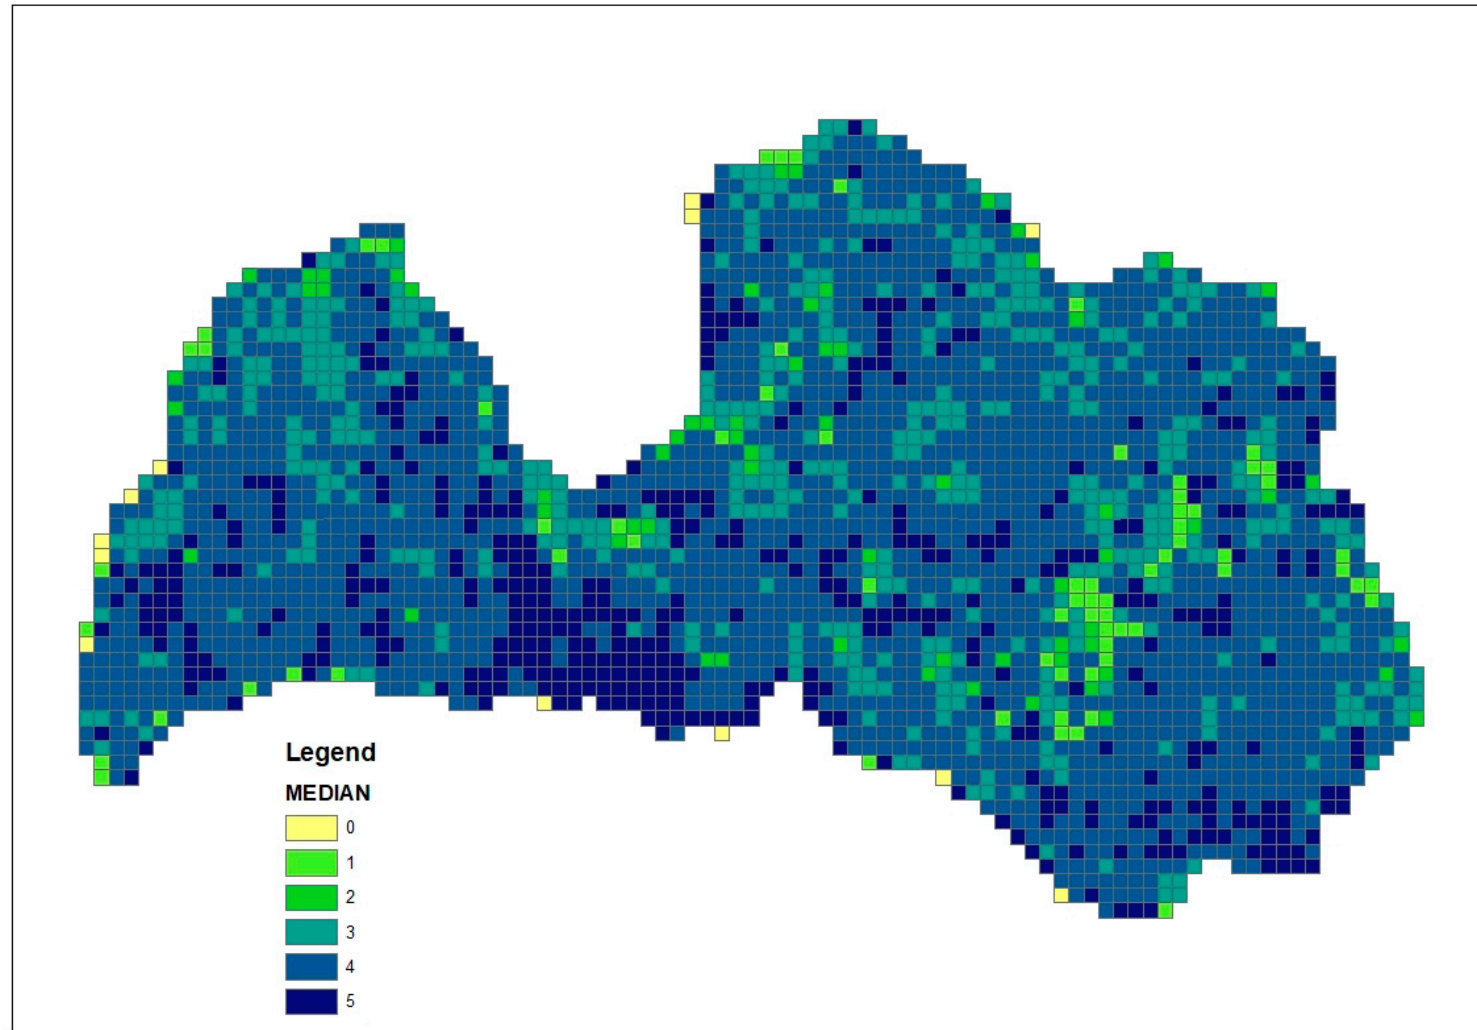

**Figure S11.** Suitability of the forest compartment to provide environment for recreation. Ecosystem service median values, aggregated on a 5x5 km grid.

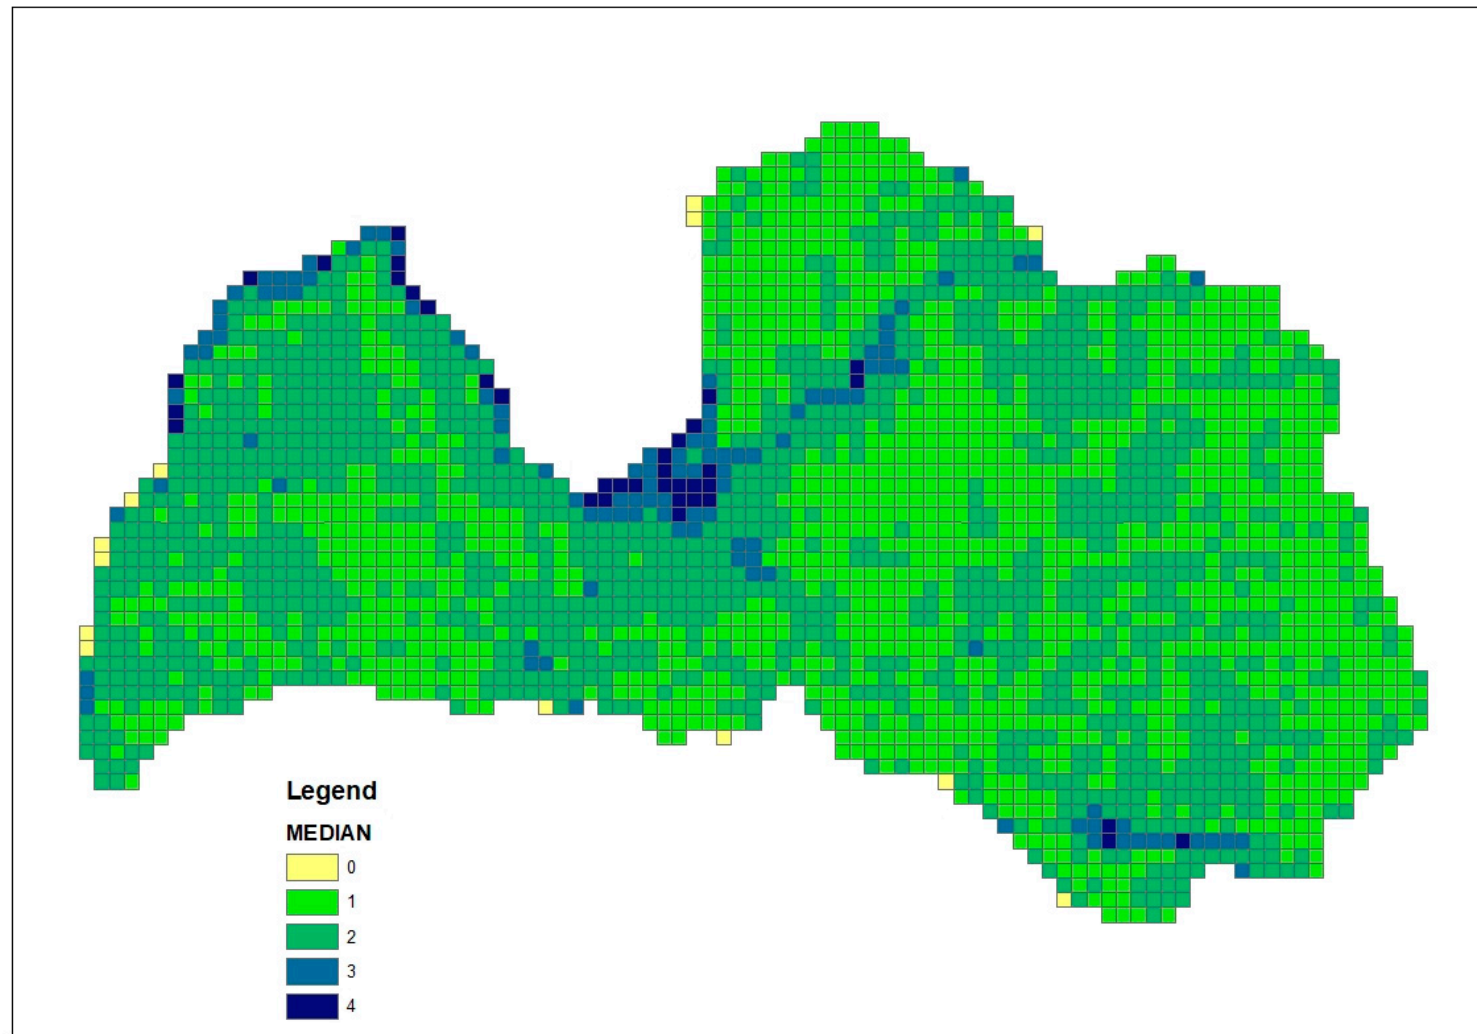



**Figure S12.** Visual attractiveness of forest stands. Ecosystem service median values, aggregated on a 5x5 km grid.

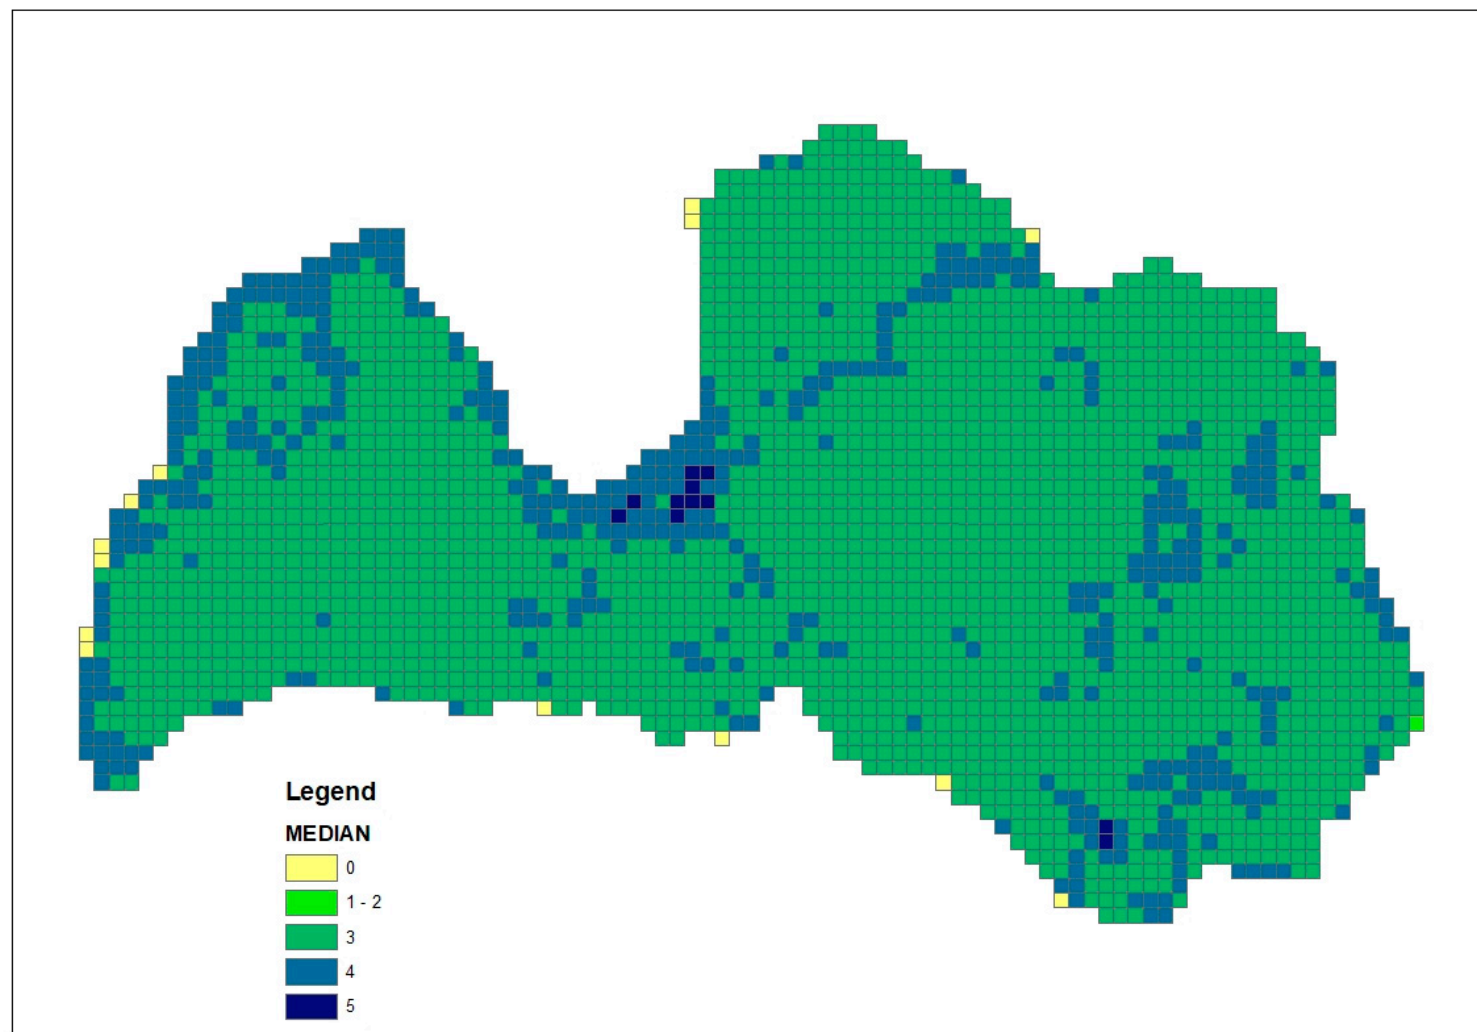

Supplement: s1 [file s1]
